# Supplementary material for: A self-assembled trimeric protein vaccine induces protective immunity against Omicron variant
Source: PubMed Central journal article supplement (PMC9482656; doi:10.1038/s41467-022-33209-9), 2022-09-17
Supplement: 41467_2022_33209_MOESM1_ESM.pdf [file 41467_2022_33209_MOESM1_ESM.pdf]

# **Supplementary Information**

## **A self-assembled trimeric protein vaccine induces protective immunity against Omicron variant**

### **Contents:**

Supplementary Figure 1, 2, 3, 4



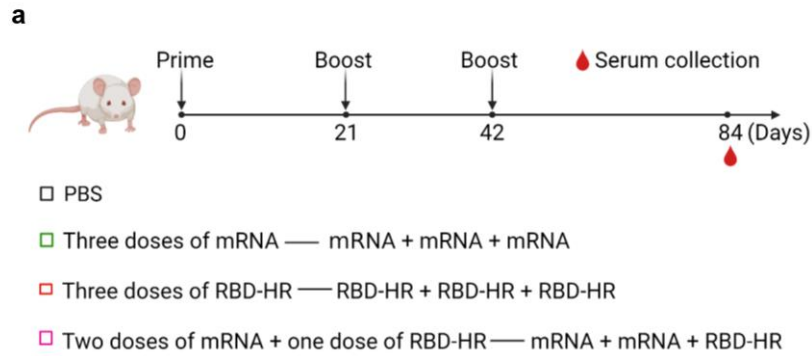

**Supplementary Fig. 2. The schematic representation of the homologous and heterologous vaccination. a,** Three doses of mRNA vaccine: the mice were immunized with three doses of 5  $\mu\text{g}$  mRNA/50  $\mu\text{L}$  of encapsulated liposome (LPX)/Spike-mRNA; three doses of RBD-HR/trimer vaccine: the mice were immunized with three doses of 10  $\mu\text{g}$  RBD-HR/trimer vaccine; two doses of mRNA and one dose of RBD-HR/trimer: the mice were immunized with two doses of 5  $\mu\text{g}$  mRNA/50  $\mu\text{L}$  of encapsulated liposome (LPX)/Spike-mRNA, and subsequently immunized with one dose of RBD-HR/trimer vaccine. And a prime-boost regimen spaced 21 days apart was adopted.

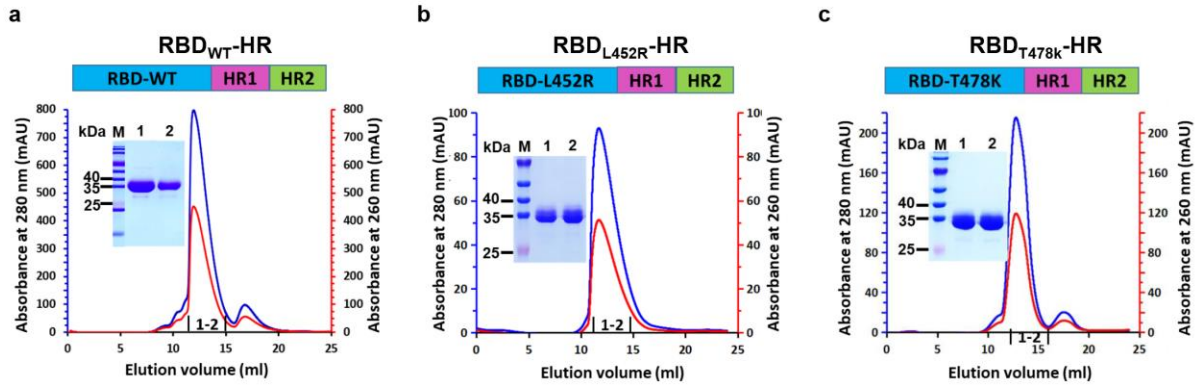

**Supplementary Fig. 3. Successful expression of RBD<sub>WT</sub>-HR, RBD<sub>L452R</sub>-HR and RBD<sub>T478K</sub>-HR proteins.** a-c, Representative elution chromatographs of the recombinant RBD<sub>WT</sub>-HR (a), RBD<sub>L452R</sub>-HR (b) and RBD<sub>T478K</sub>-HR (c) proteins using a calibrated Superdex 200 Increase column. The SDS-PAGE analysis of the eluted protein was shown.

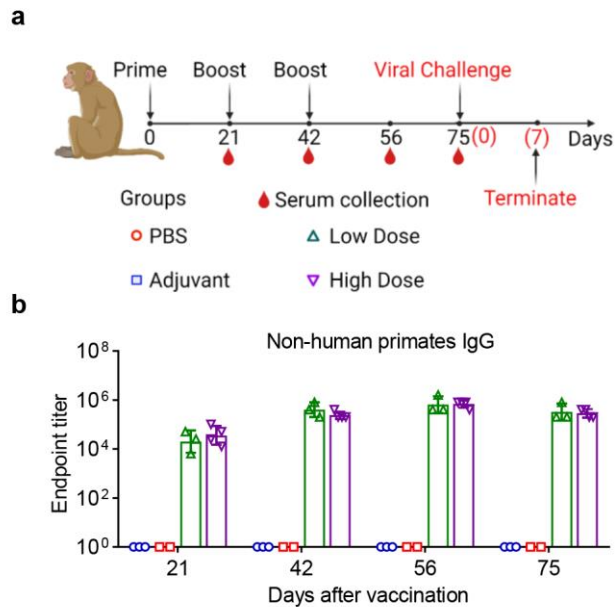

**Supplementary Fig. 4. RBD-HR/trimer induced sustained humoral immune response in non-human primates.** **a**, Non-human primates were immunized on day 0, 21, 42 with intramuscular injections of 30  $\mu$ g (low dose) or 60  $\mu$ g (high dose) of RBD-HR/trimer vaccine, respectively. Non-human primates treated with PBS or adjuvant were used as control. The immunized non-human primates were challenged with  $1 \times 10^6$  PFU of SARS-CoV-2 Delta virus on day 75 after the first immunization. **b**, The end point titers of anti-RBD specific binding antibodies induced by RBD-HR/trimer vaccine were performed, PBS: n = 3, Adjuvant: n = 2, Low dose group: n = 3, High dose: n = 4 non-human primates. Data are presented as geometric mean values  $\pm$  SD.
